# Supplementary material
Source: publisher site journal article supplement (https://www.dovepress.com/article/431470)
Supplement: Supplementary file 1 [file get_supplementary_file.php]

**Appendix**

**Chinese Version of Cyberchondria Severity Scale (C-CSS)**

Please read the following statements and imagine how they typically apply to you. Indicate the extent to which they typically apply to you by shading in the appropriate number.

| Never | Rarely | Sometimes | Often | Always |
| --- | --- | --- | --- | --- |
| 1 | 2 | 3 | 4 | 5 |

|  | 1 | 2 | 3 | 4 | 5 |
| --- | --- | --- | --- | --- | --- |
| 1. If I notice an unexplained bodily sensation, I will search for it on the Internet |  |  |  |  |  |
| 1. I enter the same symptoms into a web search on more than one occasion |  |  |  |  |  |
| 1. Researching symptoms or perceived medical conditions online interrupts other research (e.g. for my job/college assignment/homework) |  |  |  |  |  |
| 1. I am more easily annoyed or irritated after researching symptoms or perceived medical conditions online |  |  |  |  |  |
| 1. Researching symptoms or perceived medical conditions online interrupts my online leisure activities (e.g. streaming movies) |  |  |  |  |  |
| 1. Researching symptoms or perceived medical conditions online interrupts my work (e.g. writing emails, working on word documents or spreadsheets) |  |  |  |  |  |
| 1. I read different web pages about the same perceived condition |  |  |  |  |  |
| 1. Researching symptoms or perceived medical conditions online interrupts my offline social activities (reduces time spent with friends/family) |  |  |  |  |  |
| 1. I discuss my online medical findings with my GP/health professional |  |  |  |  |  |
| 1. I suggest to my GP/medical professional that I may need a diagnostic procedure that I read about online (e.g. a biopsy/ a specific blood test) |  |  |  |  |  |
| 1. Researching symptoms or perceived medical conditions online distracts me from reading news/sports/entertainment articles online |  |  |  |  |  |
| 1. I feel more anxious or distressed after researching symptoms or perceived medical conditions online |  |  |  |  |  |
| 1. I lose my appetite after researching symptoms or perceived medical conditions online, as my stomach feels sick |  |  |  |  |  |
| 1. Researching symptoms or perceived medical conditions online interrupts or slows my online communication (e.g. Instant Messaging, Skype) |  |  |  |  |  |
| 1. Researching symptoms or perceived medical conditions online interrupts my offline work activities |  |  |  |  |  |
| 1. Researching symptoms or perceived medical conditions online leads me to consult with other medical specialists (e.g. consultants) |  |  |  |  |  |
| 1. I find it hard stop worrying about symptoms or perceived medical conditions that I have researched online |  |  |  |  |  |
| 1. I have trouble getting to sleep after researching symptoms or perceived medical conditions online, as the findings play on my mind |  |  |  |  |  |
